# Supplementary material for: Distribution patterns of influenza virus receptors and viral attachment patterns in the respiratory and intestinal tracts of seven avian species
Source: Springer Nature journal article supplement (doi:10.1186/1297-9716-43-28), 2012-04-10
Supplement: 13567_2011_145_MOESM1_ESM.pdf [file 13567_2011_145_MOESM1_ESM.pdf]

# Nasal Cavity, receptor type/virus binding pattern

$\alpha$ -2,3

H4N5

$\alpha$ -2,6

H1N1

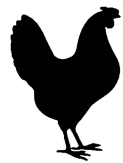

Chicken

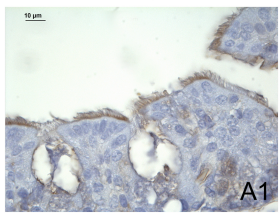

A1

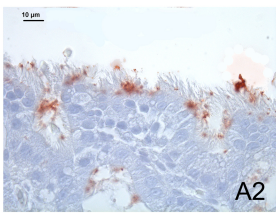

A2

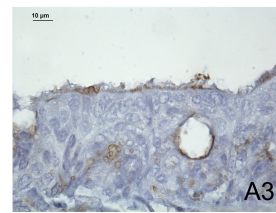

A3

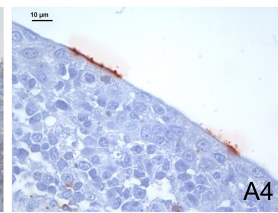

A4

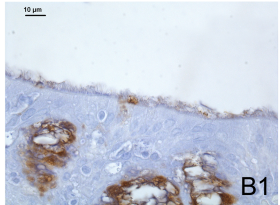

B1

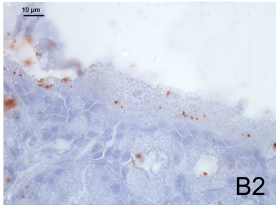

B2

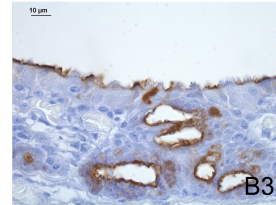

B3

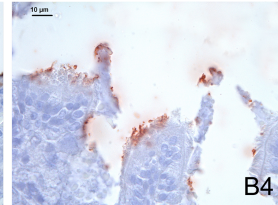

B4

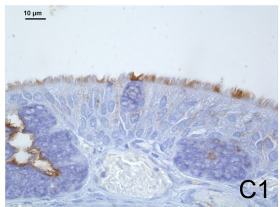

C1

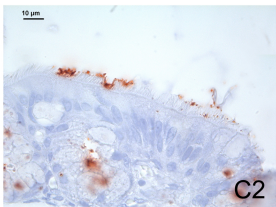

C2

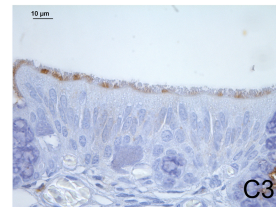

C3

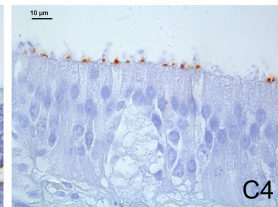

C4

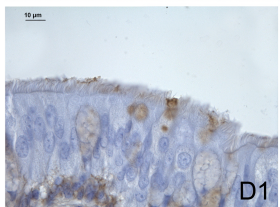

D1

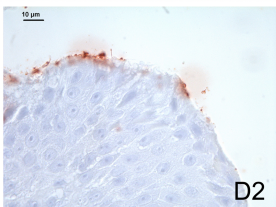

D2

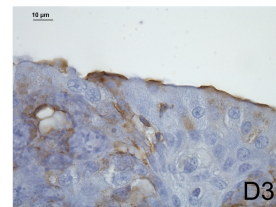

D3

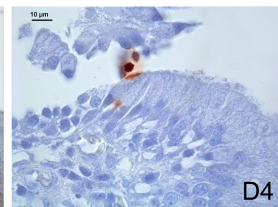

D4

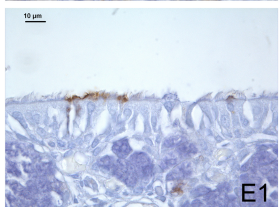

E1

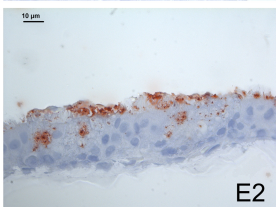

E2

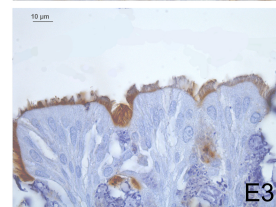

E3

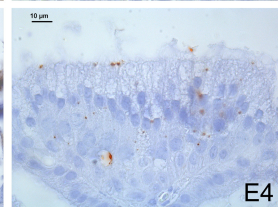

E4

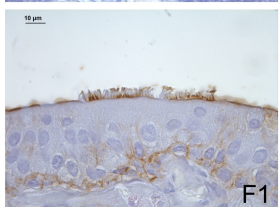

F1

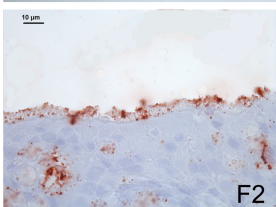

F2

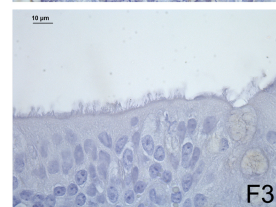

F3

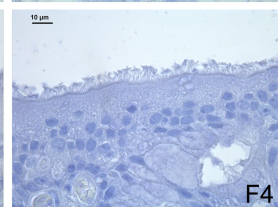

F4

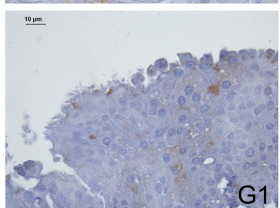

G1

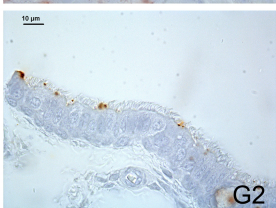

G2

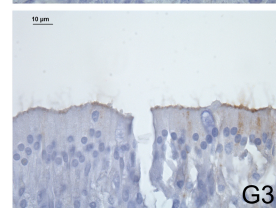

G3

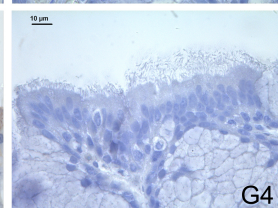

G4

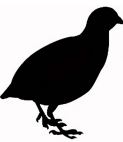

Quail

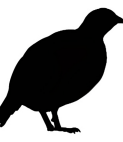

Partridge

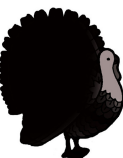

Turkey

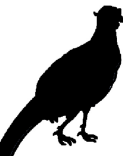

Pheasant

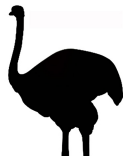

Ostrich

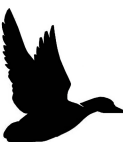

Mallard
