# Supplementary material for: Distribution patterns of influenza virus receptors and viral attachment patterns in the respiratory and intestinal tracts of seven avian species
Source: Springer Nature journal article supplement (doi:10.1186/1297-9716-43-28), 2012-04-10

# Large Intestine, receptor type/virus binding pattern

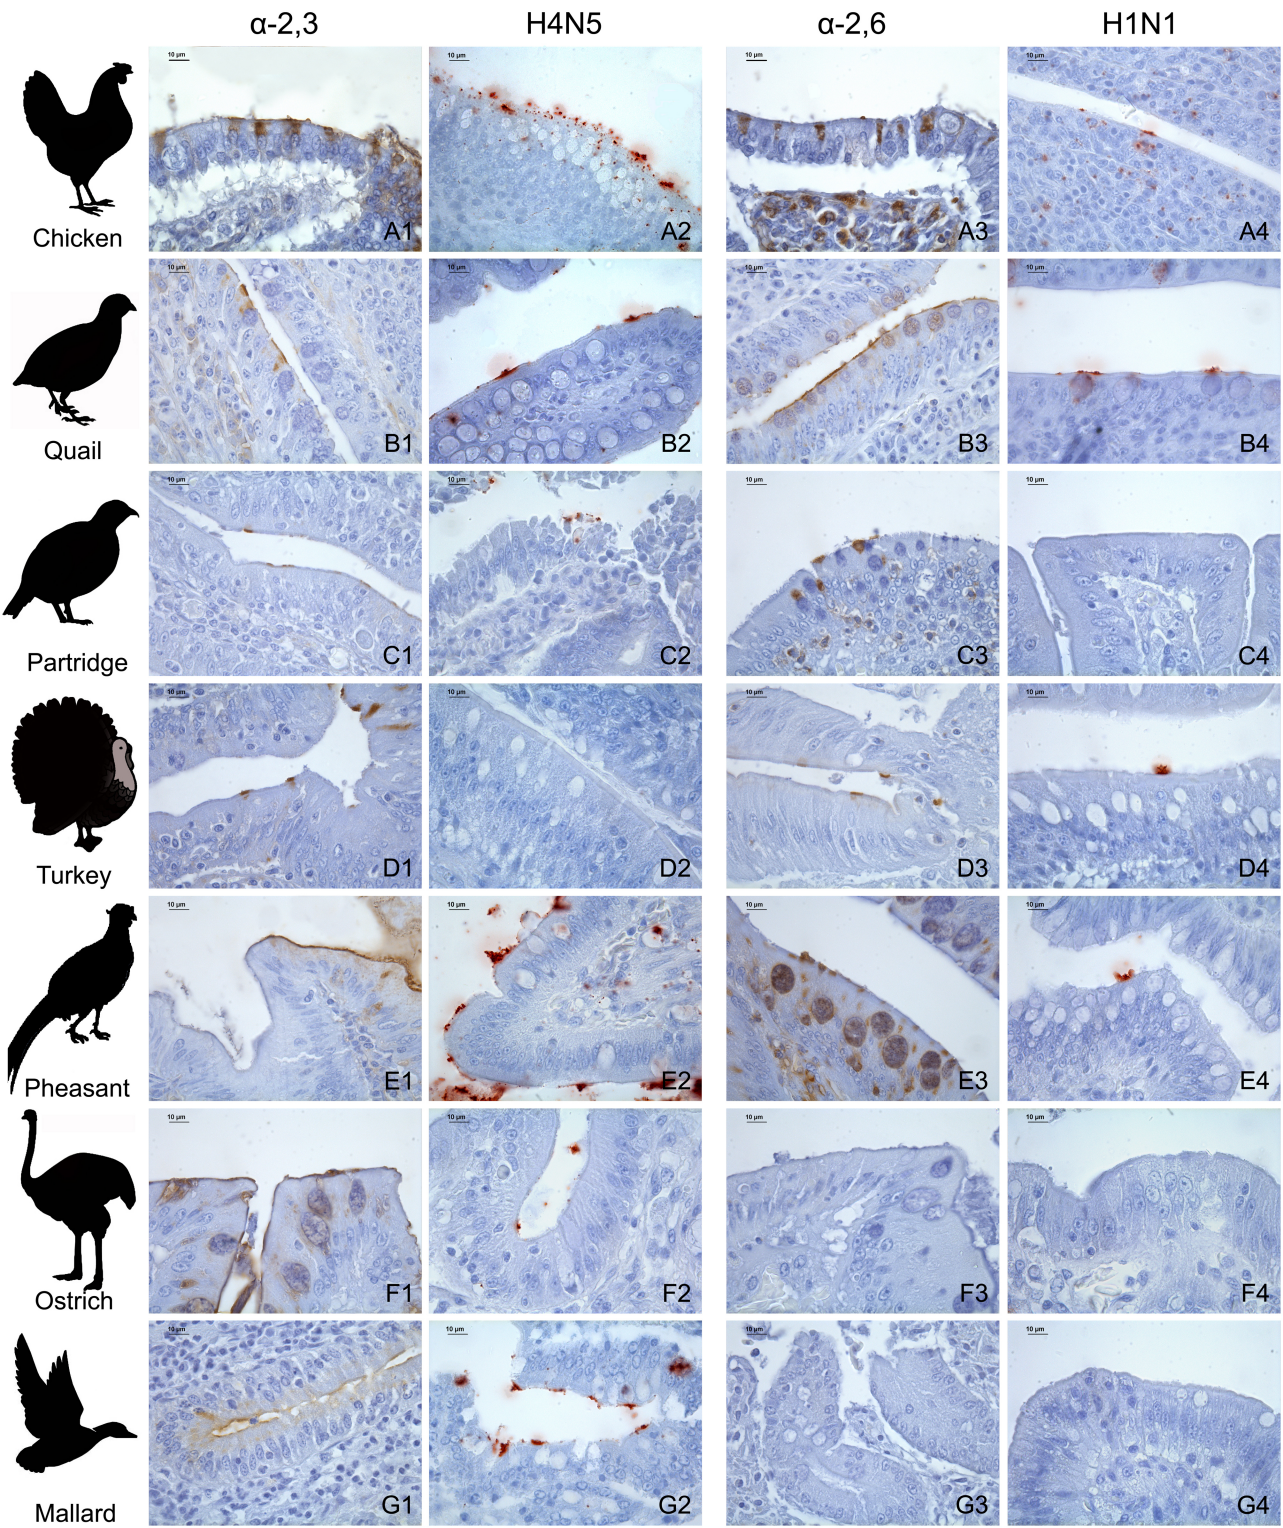

Supplement: 13567_2011_145_MOESM3_ESM.pdf [file 13567_2011_145_MOESM3_ESM.pdf]
